# Supplementary material
Source: Springer Nature journal article supplement (https://www.springermedizin.de/resource/supplementary/12931_2013_1383_MOESM5_ESM.pdf/9426148)

## A. Immunohistochemistry

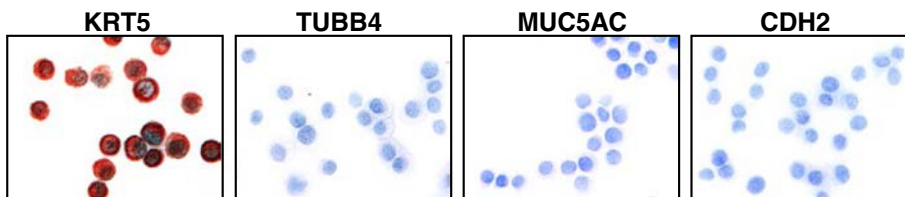

## B. Quantitative PCR

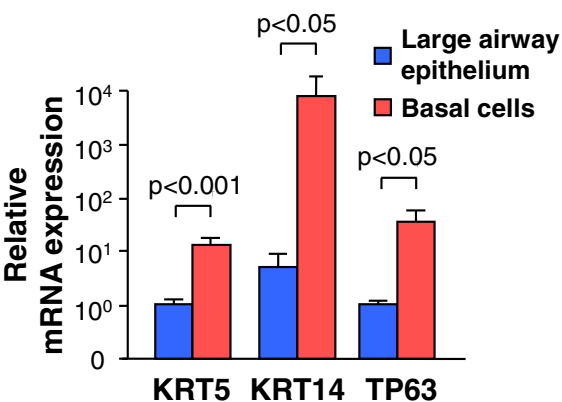

## C. Western

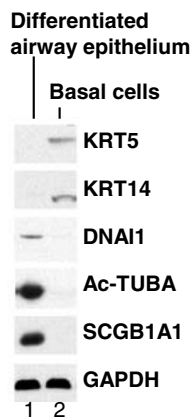

## D. Differentiation

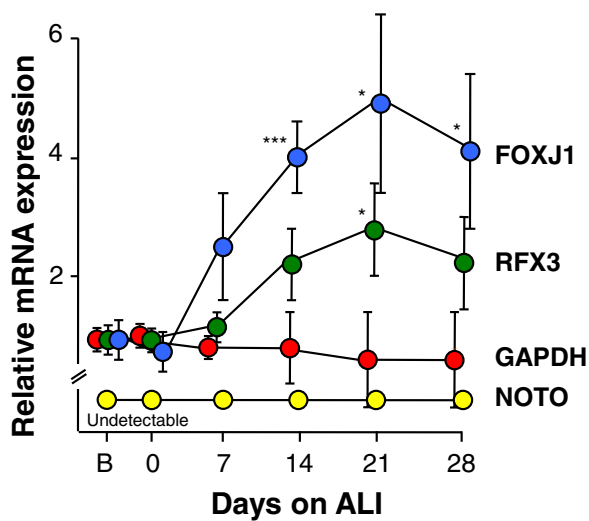

Supplement: MOESM5 [file 9426148]
